# Supplementary material for: Construction of Z-scheme heterojunction between Zn-doped UiO-66-NH2 and CeO2 towards highly selective photoreduction of CO2 to CH4
Source: Royal Society of Chemistry journal article supplement (doi:10.1039/d4tc00734d), 2024-01-01
Supplement: d4tc00734d1.pdf [file d4tc00734d1.pdf]

## Supporting information

### Construction of Z-scheme heterojunction between Zn-doped UiO-66-NH<sub>2</sub> and CeO<sub>2</sub> towards highly selective photoreduction of CO<sub>2</sub> to CH<sub>4</sub>

Hongyang Liu, Yating Xie, Yulong Li, Yonghua Zhou\*

*College of Chemistry and Chemical Engineering, Central South University, Changsha  
410083, China*

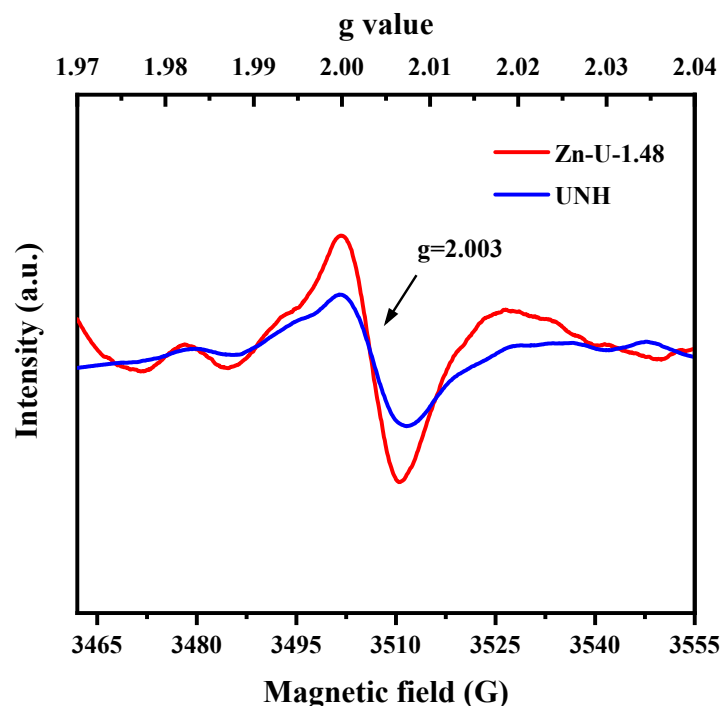

Fig. S1. EPR spectra of pure UNH and Zn-doped Zn-U-1.48.

The XRD and XPS characterizations of the samples Zn-U/C-1.0 and Zn-U/C-1.96 are shown in **Fig. S2**. It can be observed that the crystallinity of the composites is significantly decreased compared with pure UNH in **Fig. S2(a)**. Meanwhile, the intensity of the 7.2° (111) characteristic peak of Zn-U/C-1.96 decreased with the increase of  $x$  from 1.0 to 1.96. Therefore, we can conclude that the crystallinity of Zn-U/C- $x$  is also gradually destroyed when the input amount of ZnO/CeO<sub>2</sub> increases.

The Ce-N-O bond is the main evidence for the formation of heterojunction, and therefore the representation on XPS is mainly changes in the binding energy of Ce 3d and N1s. As seen in **Fig. 5**, for Zn-U/C-1.48, there is a significant positive shift in its Ce 3d binding energy compared to ZnO/CeO<sub>2</sub>. And as seen from **Fig. S2(b)**, for Zn-

U/C-1.96, the change of Ce 3d binding energy is smaller compared to ZnO/CeO<sub>2</sub>, which suggests that the Ce in Zn-U/C-1.96 favors the existence in the form of CeO<sub>2</sub> alone, resulting in a weaker binding to UNH. Meanwhile, from the N1s spectra as shown in Fig. S2(c), the peak intensities of the N-O species occurred to be decreased with the increase of the compound amount, which also indicate the weakening of the interaction between CeO<sub>2</sub> and UNH.

In conclusion, the decrease in crystallinity and the changes in the binding energy and peak intensity of Ce, N demonstrate that too high amount of ZnO/CeO<sub>2</sub> composite is detrimental to the formation of a compact heterojunction structure.

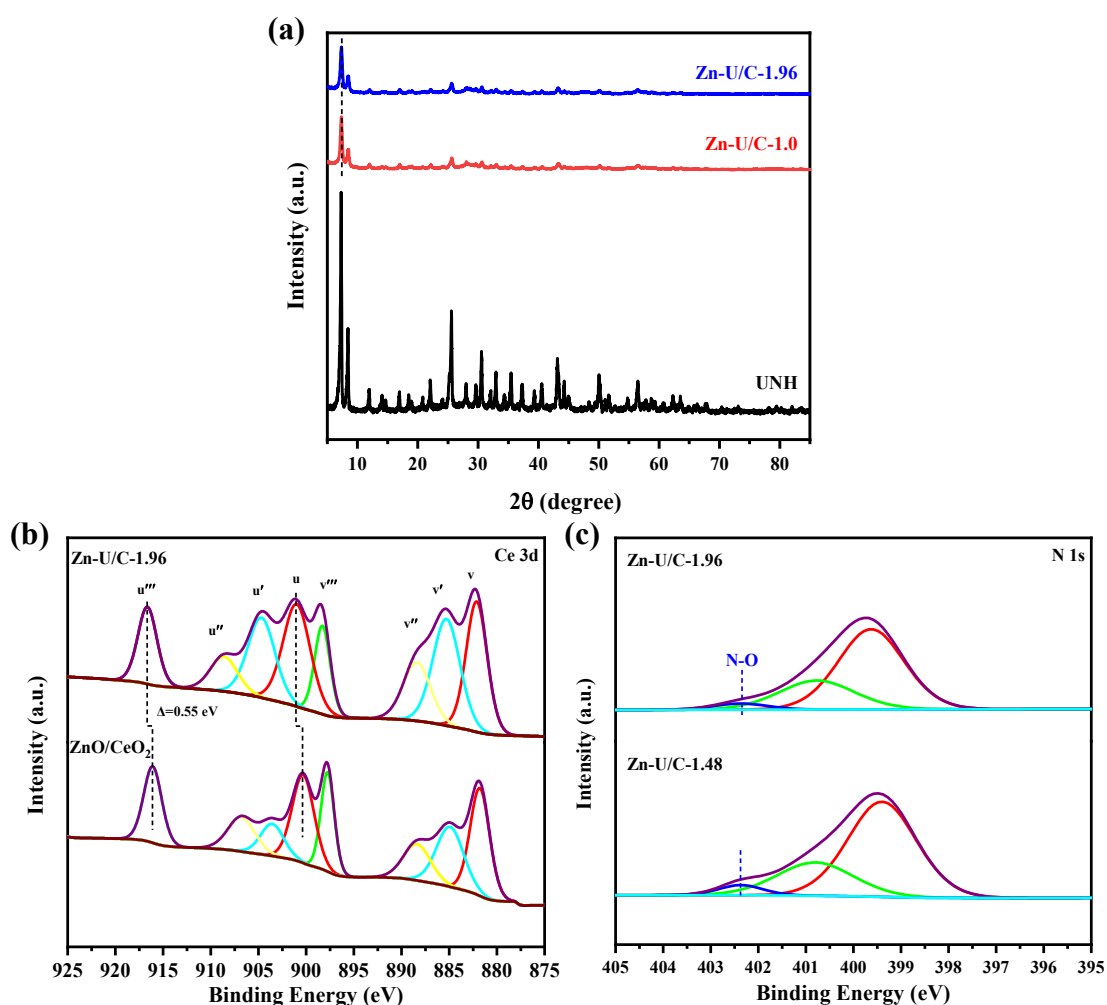

Fig. S2. XRD patterns(a) of pure UNH, Zn-U/C-1.0 and Zn-U/C-1.96, Ce 3d spectra (b) and N 1s spectra (c) of ZnO/CeO<sub>2</sub>, Zn-U/C-1.48 and Zn-U/C-1.96.

In order to investigate the effect of the ratio of Zn to Ce in ZnO/CeO<sub>2</sub> on the performance, the mass ratio  $m(\text{ZnO}/\text{CeO}_2): m(\text{UNH}) = 1.48$  is kept constant in the experiments, and ZnO/CeO<sub>2</sub> with different values of Zn/Ce molar ratios  $y$  ( $y = 6.39, 9.17, \text{ and } 11.73$ ) are obtained by varying the incorporation of ZnO. The catalytic performance of the as-prepared catalysts is shown in **Fig. S3**. It shows a slight decrease in both CO and CH<sub>4</sub> yields of the catalyst material at  $y=6.39$  compared to the sample with molar ratio  $y=9.17$ , with the most apparent decrease in performance when the ratio  $y=11.73$ , which demonstrates that the Zn to Ce ratio in the material is optimal for the molar ratio of Zn to Ce of  $y=9.17$  (the optimal catalyst in this work).

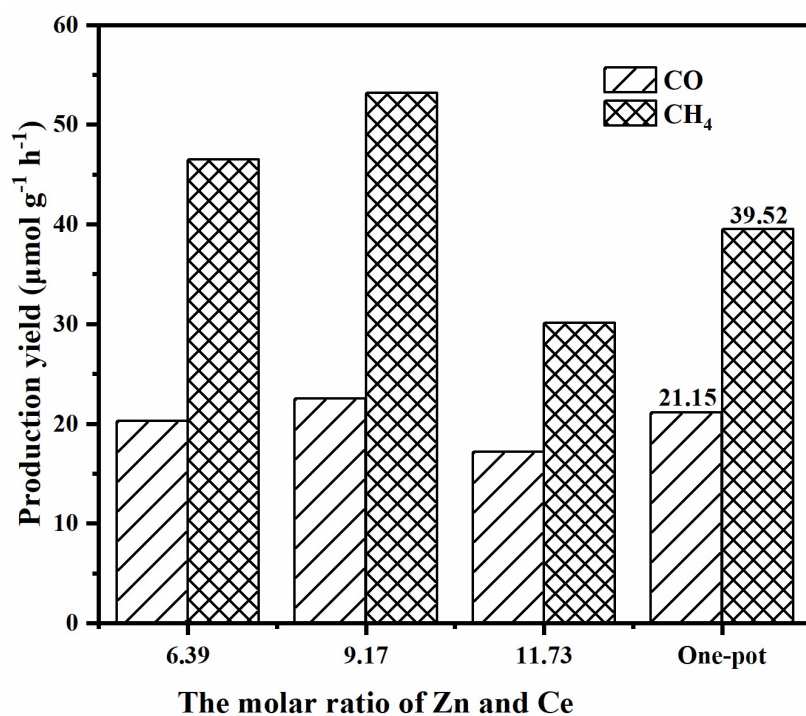

**Fig. S3.** Effect of Zn/Ce ratio and preparation method on Zn-U/C-1.48 catalyst performance.

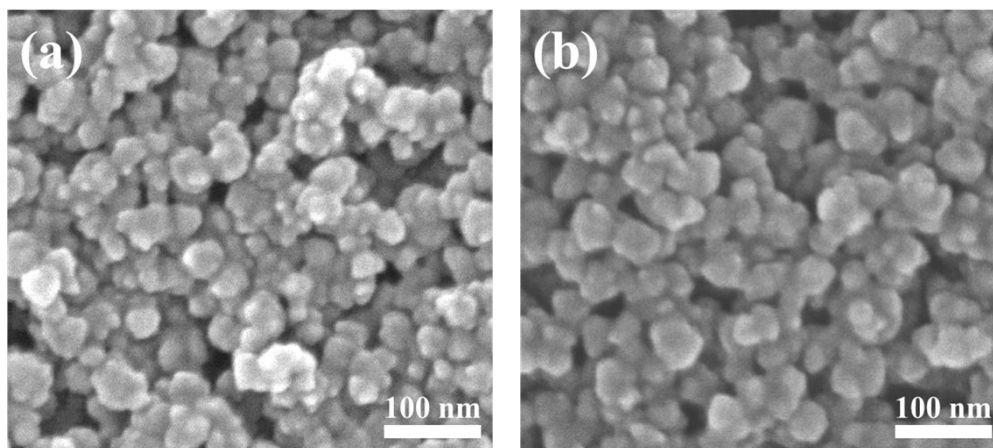

Fig S4. SEM images of fresh and used Zn-U/C-1.48 catalyst.

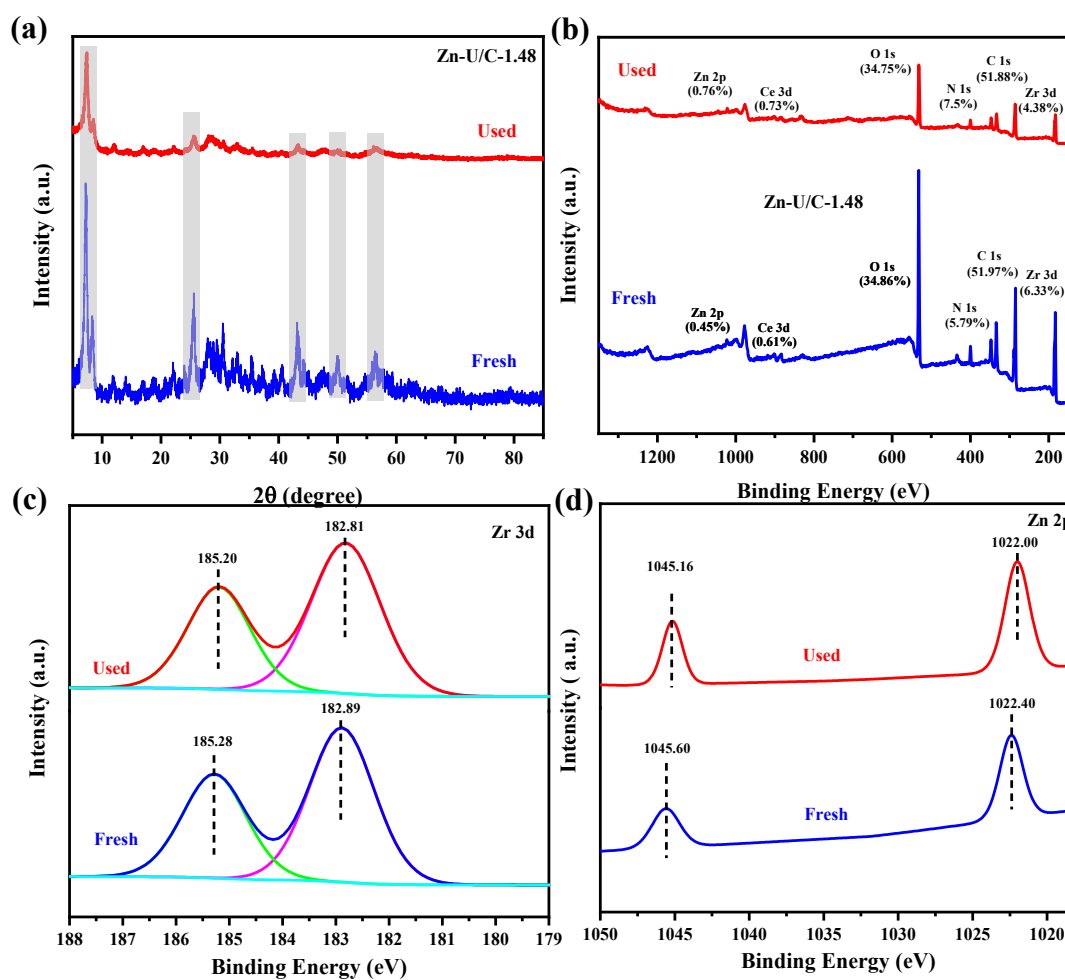

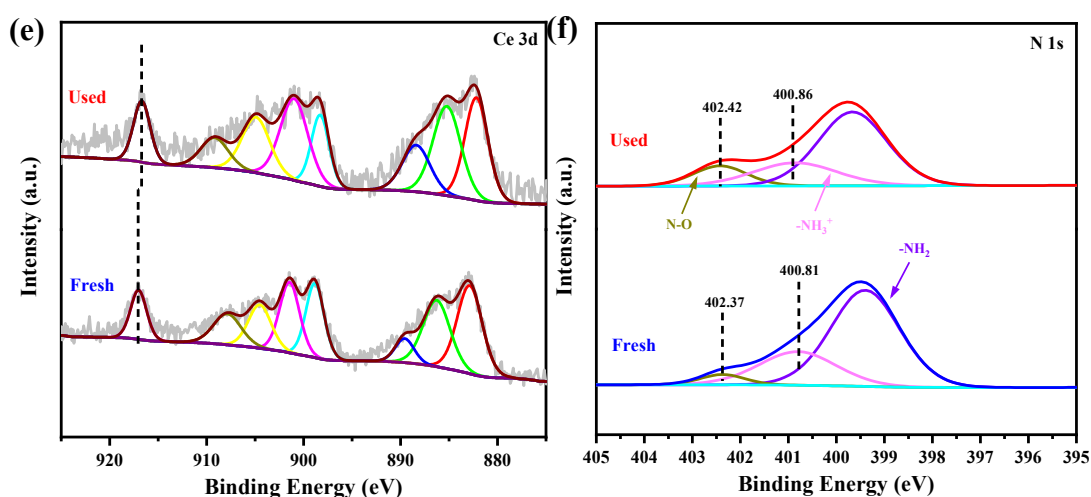

**Fig S5.** XRD patterns (a) and XPS survey spectra (b), Zr 3d spectra (c), Zn 2p spectra (d), Ce 3d spectra (e) and N 1s spectra (f) of fresh and used Zn-U/C-1.48 catalyst.

**Table S1.** Comparison of CO<sub>2</sub> photoreduction performance over some reported catalysts and this work.

| Catalysts                                         | CO and CH <sub>4</sub> yields<br>( $\mu\text{mol g}^{-1} \text{h}^{-1}$ ) | $R_{\text{electron}}$ ( $\mu\text{mol g}^{-1} \text{h}^{-1}$ ) | $S_{\text{CH}_4}$<br>(%) | Reducing agent         | References |
|---------------------------------------------------|---------------------------------------------------------------------------|----------------------------------------------------------------|--------------------------|------------------------|------------|
| UiO-66-NH <sub>2</sub> /Cu <sub>2</sub> O/Cu-0.39 | CO: 4.54                                                                  | 9.08                                                           | 0                        | H <sub>2</sub> O       | 1          |
| f-MoS <sub>2</sub> @UiO-66-NH <sub>2</sub>        | CO: 23.16<br>CH <sub>4</sub> : 27.18                                      | 263.78                                                         | 82.44                    | H <sub>2</sub> O, MeCN | 2          |
| 8%NU66/CIS                                        | CO: 11.24<br>CH <sub>4</sub> : 2.92                                       | 45.84                                                          | 51                       | H <sub>2</sub> O       | 3          |
| NH <sub>2</sub> -UiO-66/CuZnS                     | CO: 22.85                                                                 | 45.7                                                           | 0                        | water vapor            | 4          |
| UNH/Ce (HCOO) <sub>3</sub> -1.80                  | CO: 16.45<br>CH <sub>4</sub> : 29.4                                       | 268.14                                                         | 84                       | H <sub>2</sub> O, TEOA | 5          |
| NU/CC-1.6-90                                      | CO: 20.6<br>CH <sub>4</sub> : 14                                          | 152.8                                                          | 73                       | H <sub>2</sub> O, TEOA | 6          |
| UiO-66(NH <sub>2</sub> )/HGN                      | CO: 31.6<br>CH <sub>4</sub> : 1.82                                        | 77.8                                                           | 18.7                     | H <sub>2</sub> O, TEOA | 7          |
| Zn-U/C-1.48                                       | CO: 22.52<br>CH <sub>4</sub> : 53.18                                      | 470.51                                                         | 90.42                    | H <sub>2</sub> O, TEOA | This work  |

## References

- S1 X. X. Zhao, L. L. Sun, X. Jin, M. Y. Xu, S. K. Yin, J. Z. Li, X. Li, D. Shen, Y. Yan and P. W. Huo, *APPL SURF SCI*, 2021, **545**, 148967.
- S2 X. Yang, T. Y. Wang, H. Y. Ma, W. L. Shi, Z. Q. Xia, Q. Yang, P. Zhang, R. Ma, G. Xie and S. P. Chen, *J MATER SCI TECHNOL*, 2024, **182**, 210-219.
- S3 L. F. Hong, R. T. Guo, Z. W. Zhang, Y. Yuan, X. Y. Ji, Z. D. Lin and W. G. Pan, *J CO<sub>2</sub> UTIL*, 2021,

**51**, 101650.

- S4 J. T. Sun, Y. C. Guan, G. Z. Yang, S. X. Qiu, H. L. Shao, Y. Wang, G. S. Li and S. N. Xiao, *ACS SUSTAIN CHEM ENG*, 2023, **11**, 14827-14840.
- S5 N. C. Yuan, Y. X. Mei, Y. W. Liu, Y. T. Xie, B. N. Lin and Y. H. Zhou, *J CO<sub>2</sub> UTIL*, 2022, **64**, 102151.
- S6 Y. X. Mei, N. C. Yuan, Y. T. Xie, Y. P. Li, B. N. Lin and Y. H. Zhou, *APPL SURF SCI*, 2022, **597**, 153725.
- S7 Y. N. Wang, L. N. Guo, Y. Q. Zeng, H. W. Guo, S. P. Wan, M. Ou, S. L. Zhang and Q. Zhong, *ACS APPL MATER INTER*, 2019, **11**, 30673-30681.
